# Supplementary material for: Sociología de la educación
Source: Royal Society of Chemistry journal article supplement (doi:10.1039/d4dt01198h), 1976-01-01
Supplement: d4dt01198h1.pdf [file d4dt01198h1.pdf]

<Electronic Supplementary Information>

**M(II) effect on encapsulation of guests into series of  $M_3L_2$  chiral cages: Enantio-  
recognition**

Dongwon Kim,<sup>a,‡</sup> Gyeongmin Kim,<sup>a</sup> Gyeongwoo Kim,<sup>a</sup> Junmyeong Park,<sup>a</sup> Jihun Han,<sup>a</sup>  
Mohammad Mozammel Hossain,<sup>b</sup> Ok-Sang Jung<sup>\*,a</sup>, and Young-A Lee<sup>\*,c</sup>

<sup>a</sup>Department of Chemistry, Pusan National University, Busan 46241, Republic of Korea Fax: (+82) 51-5163522;

Tel: (+82) 51-5103240; E-mail: oksjung@pusan.ac.kr

<sup>b</sup>Department of Electrochemistry, Korea Institute of Materials Science, Changwon 51508, Republic of Korea

<sup>c</sup>Department of Chemistry, Jeonbuk National University, Jeonju 54896, Republic of Korea

<sup>‡</sup>Current Address: Pohang Accelerator Laboratory, POSTECH, Pohang, 37673, Republic of Korea

**Table S1** Crystallographic data

|                                                                          | [(Me <sub>2</sub> CO)(H <sub>2</sub> O)@Ni <sub>3</sub> ( <i>s,r</i> -L) <sub>2</sub> (H <sub>2</sub> O) <sub>11</sub> ](ClO <sub>4</sub> ) <sub>6</sub> ·7Me <sub>2</sub> CO | [(Me <sub>2</sub> CO)@Cu <sub>3</sub> ( <i>s,r</i> -L) <sub>2</sub> (H <sub>2</sub> O) <sub>9</sub> ](ClO <sub>4</sub> ) <sub>6</sub> ·7Me <sub>2</sub> CO | [(Me <sub>2</sub> CO)(H <sub>2</sub> O)@Zn <sub>3</sub> ( <i>s,r</i> -L) <sub>2</sub> (H <sub>2</sub> O) <sub>11</sub> ](ClO <sub>4</sub> ) <sub>6</sub> ·7Me <sub>2</sub> CO |
|--------------------------------------------------------------------------|-------------------------------------------------------------------------------------------------------------------------------------------------------------------------------|------------------------------------------------------------------------------------------------------------------------------------------------------------|-------------------------------------------------------------------------------------------------------------------------------------------------------------------------------|
| Formula                                                                  | C <sub>132</sub> H <sub>156</sub> Cl <sub>6</sub> N <sub>12</sub> Ni <sub>3</sub> O <sub>62</sub>                                                                             | C <sub>132</sub> H <sub>150</sub> Cl <sub>6</sub> Cu <sub>3</sub> N <sub>12</sub> O <sub>59</sub>                                                          | C <sub>132</sub> H <sub>156</sub> Cl <sub>6</sub> N <sub>12</sub> O <sub>62</sub> Zn <sub>3</sub>                                                                             |
| <i>M<sub>w</sub></i>                                                     | 3291.51                                                                                                                                                                       | 3251.95                                                                                                                                                    | 3311.49                                                                                                                                                                       |
| Cryst. sys.                                                              | Orthorhombic                                                                                                                                                                  | Orthorhombic                                                                                                                                               | Orthorhombic                                                                                                                                                                  |
| Space group                                                              | <i>P</i> 2 <sub>1</sub> 2 <sub>1</sub> 2                                                                                                                                      | <i>P</i> 2 <sub>1</sub> 2 <sub>1</sub> 2                                                                                                                   | <i>P</i> 2 <sub>1</sub> 2 <sub>1</sub> 2                                                                                                                                      |
| <i>a</i> (Å)                                                             | 23.168(5)                                                                                                                                                                     | 10.6097(2)                                                                                                                                                 | 23.173(3)                                                                                                                                                                     |
| <i>b</i> (Å)                                                             | 24.785(5)                                                                                                                                                                     | 24.982(5)                                                                                                                                                  | 24.840(3)                                                                                                                                                                     |
| <i>c</i> (Å)                                                             | 14.620(3)                                                                                                                                                                     | 14.522(3)                                                                                                                                                  | 14.539(2)                                                                                                                                                                     |
| <i>V</i> (Å <sup>3</sup> )                                               | 8395(3)                                                                                                                                                                       | 8356(3)                                                                                                                                                    | 8369(2)                                                                                                                                                                       |
| <i>Z</i>                                                                 | 2                                                                                                                                                                             | 2                                                                                                                                                          | 2                                                                                                                                                                             |
| $\rho$ (g cm <sup>-3</sup> )                                             | 1.302                                                                                                                                                                         | 1.292                                                                                                                                                      | 1.314                                                                                                                                                                         |
| $\mu$ (mm <sup>-1</sup> )                                                | 0.492                                                                                                                                                                         | 0.535                                                                                                                                                      | 0.610                                                                                                                                                                         |
| F(000)                                                                   | 3428                                                                                                                                                                          | 3374                                                                                                                                                       | 3440                                                                                                                                                                          |
| <i>R</i> <sub>int</sub>                                                  | 0.0522                                                                                                                                                                        | 0.0544                                                                                                                                                     | 0.1033                                                                                                                                                                        |
| GoF on <i>F</i> <sup>2</sup>                                             | 1.158                                                                                                                                                                         | 1.058                                                                                                                                                      | 1.020                                                                                                                                                                         |
| <i>R</i> <sub>1</sub> [ <i>I</i> > 2 $\sigma$ ( <i>I</i> )] <sup>a</sup> | 0.0611                                                                                                                                                                        | 0.0518                                                                                                                                                     | 0.0668                                                                                                                                                                        |
| <i>wR</i> <sub>2</sub> (all data) <sup>b</sup>                           | 0.2035                                                                                                                                                                        | 0.1609                                                                                                                                                     | 0.2141                                                                                                                                                                        |
| Absolute structure parameter                                             | 0.023(3)                                                                                                                                                                      | 0.010(3)                                                                                                                                                   | 0.032(5)                                                                                                                                                                      |
|                                                                          | [(Me <sub>2</sub> CO)(H <sub>2</sub> O)@Ni <sub>3</sub> ( <i>r,s</i> -L) <sub>2</sub> (H <sub>2</sub> O) <sub>11</sub> ](ClO <sub>4</sub> ) <sub>6</sub> ·7Me <sub>2</sub> CO | [(Me <sub>2</sub> CO)@Cu <sub>3</sub> ( <i>r,s</i> -L) <sub>2</sub> (H <sub>2</sub> O) <sub>9</sub> ](ClO <sub>4</sub> ) <sub>6</sub> ·7Me <sub>2</sub> CO | [(Me <sub>2</sub> CO)(H <sub>2</sub> O)@Zn <sub>3</sub> ( <i>r,s</i> -L) <sub>2</sub> (H <sub>2</sub> O) <sub>11</sub> ](ClO <sub>4</sub> ) <sub>6</sub> ·7Me <sub>2</sub> CO |
| Formula                                                                  | C <sub>132</sub> H <sub>156</sub> Cl <sub>6</sub> N <sub>12</sub> Ni <sub>3</sub> O <sub>62</sub>                                                                             | C <sub>264</sub> H <sub>300</sub> Cl <sub>12</sub> Cu <sub>6</sub> N <sub>24</sub> O <sub>118</sub>                                                        | C <sub>132</sub> H <sub>156</sub> Cl <sub>6</sub> N <sub>12</sub> O <sub>62</sub> Zn <sub>3</sub>                                                                             |
| <i>M<sub>w</sub></i>                                                     | 3291.51                                                                                                                                                                       | 6503.90                                                                                                                                                    | 3311.49                                                                                                                                                                       |
| Cryst. sys.                                                              | Orthorhombic                                                                                                                                                                  | Orthorhombic                                                                                                                                               | Orthorhombic                                                                                                                                                                  |
| Space group                                                              | <i>P</i> 2 <sub>1</sub> 2 <sub>1</sub> 2                                                                                                                                      | <i>P</i> 2 <sub>1</sub> 2 <sub>1</sub> 2                                                                                                                   | <i>P</i> 2 <sub>1</sub> 2 <sub>1</sub> 2                                                                                                                                      |
| <i>a</i> (Å)                                                             | 23.136(5)                                                                                                                                                                     | 22.963(5)                                                                                                                                                  | 23.292(5)                                                                                                                                                                     |
| <i>b</i> (Å)                                                             | 24.872(5)                                                                                                                                                                     | 24.980(5)                                                                                                                                                  | 24.799(5)                                                                                                                                                                     |
| <i>c</i> (Å)                                                             | 14.593(3)                                                                                                                                                                     | 14.527(3)                                                                                                                                                  | 14.573(3)                                                                                                                                                                     |
| <i>V</i> (Å <sup>3</sup> )                                               | 8397(3)                                                                                                                                                                       | 8333(3)                                                                                                                                                    | 8418(3)                                                                                                                                                                       |
| <i>Z</i>                                                                 | 2                                                                                                                                                                             | 1                                                                                                                                                          | 2                                                                                                                                                                             |
| $\rho$ (g cm <sup>-3</sup> )                                             | 1.302                                                                                                                                                                         | 1.296                                                                                                                                                      | 1.307                                                                                                                                                                         |
| $\mu$ (mm <sup>-1</sup> )                                                | 0.492                                                                                                                                                                         | 0.536                                                                                                                                                      | 0.649                                                                                                                                                                         |
| F(000)                                                                   | 3428                                                                                                                                                                          | 3374                                                                                                                                                       | 3440                                                                                                                                                                          |
| <i>R</i> <sub>int</sub>                                                  | 0.0430                                                                                                                                                                        | 0.0460                                                                                                                                                     | 0.0834                                                                                                                                                                        |
| GoF on <i>F</i> <sup>2</sup>                                             | 1.089                                                                                                                                                                         | 0.995                                                                                                                                                      | 0.980                                                                                                                                                                         |
| <i>R</i> <sub>1</sub> [ <i>I</i> > 2 $\sigma$ ( <i>I</i> )] <sup>a</sup> | 0.0607                                                                                                                                                                        | 0.0592                                                                                                                                                     | 0.1148                                                                                                                                                                        |
| <i>wR</i> <sub>2</sub> (all data) <sup>b</sup>                           | 0.1865                                                                                                                                                                        | 0.1765                                                                                                                                                     | 0.3346                                                                                                                                                                        |
| Absolute structure parameter                                             | 0.024(3)                                                                                                                                                                      | 0.021(5)                                                                                                                                                   | 0.073(7)                                                                                                                                                                      |

<sup>a</sup>*R*<sub>1</sub> =  $\Sigma||F_o| - |F_c||/\Sigma|F_o|$ , <sup>b</sup>*wR*<sub>2</sub> =  $(\Sigma[w(F_o^2 - F_c^2)^2]/\Sigma[w(F_o^2)^2])^{1/2}$

**Table S1 (Continued)**

|                                                                          | [(Me <sub>2</sub> CO)(H <sub>2</sub> O)@Ni <sub>3</sub> ( <i>s,r</i> -L) <sub>2</sub> (H <sub>2</sub> O) <sub>11</sub> ](ClO <sub>4</sub> ) <sub>6</sub> ·6(( <i>S</i> )-2-BuOH) | [(Me <sub>2</sub> CO)(H <sub>2</sub> O)@Ni <sub>3</sub> ( <i>s,r</i> -L) <sub>2</sub> (H <sub>2</sub> O) <sub>11</sub> ](ClO <sub>4</sub> ) <sub>6</sub> ·6(( <i>R</i> )-2-BuOH) |
|--------------------------------------------------------------------------|----------------------------------------------------------------------------------------------------------------------------------------------------------------------------------|----------------------------------------------------------------------------------------------------------------------------------------------------------------------------------|
| Formula                                                                  | C <sub>135</sub> H <sub>174</sub> Cl <sub>6</sub> N <sub>12</sub> Ni <sub>3</sub> O <sub>61</sub>                                                                                | C <sub>135</sub> H <sub>174</sub> Cl <sub>6</sub> N <sub>12</sub> Ni <sub>3</sub> O <sub>61</sub>                                                                                |
| <i>M<sub>w</sub></i>                                                     | 3329.68                                                                                                                                                                          | 3329.68                                                                                                                                                                          |
| Cryst. sys.                                                              | Orthorhombic                                                                                                                                                                     | Orthorhombic                                                                                                                                                                     |
| Space group                                                              | <i>P</i> 2 <sub>1</sub> 2 <sub>1</sub> 2                                                                                                                                         | <i>P</i> 2 <sub>1</sub> 2 <sub>1</sub> 2                                                                                                                                         |
| <i>a</i> (Å)                                                             | 23.205(5)                                                                                                                                                                        | 23.225(5)                                                                                                                                                                        |
| <i>b</i> (Å)                                                             | 24.806(5)                                                                                                                                                                        | 24.677(5)                                                                                                                                                                        |
| <i>c</i> (Å)                                                             | 14.483(3)                                                                                                                                                                        | 14.453(3)                                                                                                                                                                        |
| <i>V</i> (Å <sup>3</sup> )                                               | 8337(3)                                                                                                                                                                          | 8283(3)                                                                                                                                                                          |
| <i>Z</i>                                                                 | 2                                                                                                                                                                                | 2                                                                                                                                                                                |
| $\rho$ (g cm <sup>-3</sup> )                                             | 1.326                                                                                                                                                                            | 1.335                                                                                                                                                                            |
| $\mu$ (mm <sup>-1</sup> )                                                | 0.496                                                                                                                                                                            | 0.0479                                                                                                                                                                           |
| F(000)                                                                   | 3484                                                                                                                                                                             | 3484                                                                                                                                                                             |
| <i>R</i> <sub>int</sub>                                                  | 0.0729                                                                                                                                                                           | 0.0544                                                                                                                                                                           |
| GoF on <i>F</i> <sup>2</sup>                                             | 1.093                                                                                                                                                                            | 1.184                                                                                                                                                                            |
| <i>R</i> <sub>1</sub> [ <i>I</i> > 2 $\sigma$ ( <i>I</i> )] <sup>a</sup> | 0.0767                                                                                                                                                                           | 0.0656                                                                                                                                                                           |
| <i>wR</i> <sub>2</sub> (all data) <sup>b</sup>                           | 0.2580                                                                                                                                                                           | 0.2253                                                                                                                                                                           |
| Absolute structure parameter                                             | 0.030(3)                                                                                                                                                                         | 0.027(3)                                                                                                                                                                         |
|                                                                          | [(Me <sub>2</sub> CO)(H <sub>2</sub> O)@Ni <sub>3</sub> ( <i>r,s</i> -L) <sub>2</sub> (H <sub>2</sub> O) <sub>11</sub> ](ClO <sub>4</sub> ) <sub>6</sub> ·6(( <i>S</i> )-2-BuOH) | [(Me <sub>2</sub> CO)(H <sub>2</sub> O)@Ni <sub>3</sub> ( <i>r,s</i> -L) <sub>2</sub> (H <sub>2</sub> O) <sub>11</sub> ](ClO <sub>4</sub> ) <sub>6</sub> ·6(( <i>R</i> )-2-BuOH) |
| Formula                                                                  | C <sub>135</sub> H <sub>174</sub> Cl <sub>6</sub> N <sub>12</sub> Ni <sub>3</sub> O <sub>61</sub>                                                                                | C <sub>135</sub> H <sub>174</sub> Cl <sub>6</sub> N <sub>12</sub> Ni <sub>3</sub> O <sub>61</sub>                                                                                |
| <i>M<sub>w</sub></i>                                                     | 3329.68                                                                                                                                                                          | 3329.68                                                                                                                                                                          |
| Cryst. sys.                                                              | Orthorhombic                                                                                                                                                                     | Orthorhombic                                                                                                                                                                     |
| Space group                                                              | <i>P</i> 2 <sub>1</sub> 2 <sub>1</sub> 2                                                                                                                                         | <i>P</i> 2 <sub>1</sub> 2 <sub>1</sub> 2                                                                                                                                         |
| <i>a</i> (Å)                                                             | 23.201(5)                                                                                                                                                                        | 23.255(5)                                                                                                                                                                        |
| <i>b</i> (Å)                                                             | 24.714(5)                                                                                                                                                                        | 24.745(5)                                                                                                                                                                        |
| <i>c</i> (Å)                                                             | 14.446(3)                                                                                                                                                                        | 14.510(3)                                                                                                                                                                        |
| <i>V</i> (Å <sup>3</sup> )                                               | 8283(3)                                                                                                                                                                          | 8350(3)                                                                                                                                                                          |
| <i>Z</i>                                                                 | 2                                                                                                                                                                                | 2                                                                                                                                                                                |
| $\rho$ (g cm <sup>-3</sup> )                                             | 1.335                                                                                                                                                                            | 1.324                                                                                                                                                                            |
| $\mu$ (mm <sup>-1</sup> )                                                | 0.499                                                                                                                                                                            | 0.495                                                                                                                                                                            |
| F(000)                                                                   | 3484                                                                                                                                                                             | 3484                                                                                                                                                                             |
| <i>R</i> <sub>int</sub>                                                  | 0.0423                                                                                                                                                                           | 0.0522                                                                                                                                                                           |
| GoF on <i>F</i> <sup>2</sup>                                             | 1.131                                                                                                                                                                            | 1.019                                                                                                                                                                            |
| <i>R</i> <sub>1</sub> [ <i>I</i> > 2 $\sigma$ ( <i>I</i> )] <sup>a</sup> | 0.0744                                                                                                                                                                           | 0.0615                                                                                                                                                                           |
| <i>wR</i> <sub>2</sub> (all data) <sup>b</sup>                           | 0.2467                                                                                                                                                                           | 0.1882                                                                                                                                                                           |
| Absolute structure parameter                                             | 0.030(3)                                                                                                                                                                         | 0.020(3)                                                                                                                                                                         |

<sup>a</sup>*R*<sub>1</sub> =  $\Sigma||F_o| - |F_c||/\Sigma|F_o|$ , <sup>b</sup>*wR*<sub>2</sub> =  $(\Sigma[w(F_o^2 - F_c^2)^2]/\Sigma[w(F_o^2)^2])^{1/2}$

**Table S2** Selected bond length (Å) and angle (°)

| [(Me <sub>2</sub> CO)(H <sub>2</sub> O)@Ni <sub>3</sub> ( <i>s,r</i> -L) <sub>2</sub> (H <sub>2</sub> O) <sub>11</sub> ](ClO <sub>4</sub> ) <sub>6</sub> ·7Me <sub>2</sub> CO |           | [(Me <sub>2</sub> CO)@Cu <sub>3</sub> ( <i>s,r</i> -L) <sub>2</sub> (H <sub>2</sub> O) <sub>9</sub> ](ClO <sub>4</sub> ) <sub>6</sub> ·7Me <sub>2</sub> CO |          | [(Me <sub>2</sub> CO)(H <sub>2</sub> O)@Zn <sub>3</sub> ( <i>s,r</i> -L) <sub>2</sub> (H <sub>2</sub> O) <sub>11</sub> ](ClO <sub>4</sub> ) <sub>6</sub> ·7Me <sub>2</sub> CO |          |
|-------------------------------------------------------------------------------------------------------------------------------------------------------------------------------|-----------|------------------------------------------------------------------------------------------------------------------------------------------------------------|----------|-------------------------------------------------------------------------------------------------------------------------------------------------------------------------------|----------|
| Ni(1)-N(3)                                                                                                                                                                    | 2.088(4)  | Cu(1)-N(6)                                                                                                                                                 | 1.978(4) | Zn(1)-N(1A)                                                                                                                                                                   | 2.132(7) |
| Ni(1)-N(5) <sup>#1</sup>                                                                                                                                                      | 2.090(4)  | Cu(2) <sup>#1</sup> -N(1)                                                                                                                                  | 1.997(4) | Zn(1)-N(4A) <sup>#1</sup>                                                                                                                                                     | 2.110(7) |
| Ni(2)-N(1)                                                                                                                                                                    | 2.077(4)  | Cu(2)-N(4)                                                                                                                                                 | 1.999(4) | Zn(2)-N(6A)                                                                                                                                                                   | 2.072(7) |
| Ni(1)-O(10)                                                                                                                                                                   | 2.027(5)  | Cu(1)-O(2A)                                                                                                                                                | 1.978(3) | Zn(1)-O(13)                                                                                                                                                                   | 2.086(7) |
| Ni(1)-O(11)                                                                                                                                                                   | 2.029(5)  | Cu(1)-O(1A)                                                                                                                                                | 2.354(5) | Zn(1)-O(11)                                                                                                                                                                   | 2.087(6) |
| Ni(1)-O(12)                                                                                                                                                                   | 2.057(5)  | Cu(2)-O(3A)                                                                                                                                                | 2.364(2) | Zn(1)-O(14)                                                                                                                                                                   | 2.094(7) |
| Ni(1)-O(17)                                                                                                                                                                   | 2.093(9)  | Cu(2)-O(5A)                                                                                                                                                | 1.978(4) | Zn(2)-O(15)                                                                                                                                                                   | 2.093(6) |
| Ni(2)-O(15)                                                                                                                                                                   | 2.049(5)  | Cu(2)-O(4A)                                                                                                                                                | 2.227(5) | Zn(2)-O(16)                                                                                                                                                                   | 2.135(8) |
| Ni(2)-O(14)                                                                                                                                                                   | 2.082(5)  |                                                                                                                                                            |          | Zn(2)-O(17)                                                                                                                                                                   | 2.30(1)  |
|                                                                                                                                                                               |           | N(6)-Cu(1)-N(6) <sup>#1</sup>                                                                                                                              | 175.7(2) |                                                                                                                                                                               |          |
| N(3)-Ni(1)-N(5) <sup>#1</sup>                                                                                                                                                 | 176.5(2)  | N(1) <sup>#1</sup> -Cu(2)-N(4)                                                                                                                             | 171.6(2) | N(4A) <sup>#1</sup> -Zn(1)-N(1A)                                                                                                                                              | 175.0(3) |
| N(1)-Ni(2)-N(1) <sup>#1</sup>                                                                                                                                                 | 177.6(2)  | N(6)-Cu(1)-O(2A)                                                                                                                                           | 88.4(2)  | N(6A) <sup>#1</sup> -Zn(2)-N(6A)                                                                                                                                              | 176.2(4) |
| O(10)-Ni(1)-N(3)                                                                                                                                                              | 88.4(2)   | N(6) <sup>#1</sup> -Cu(1)-O(2A)                                                                                                                            | 91.6(2)  | O(13)-Zn(1)-N(1A)                                                                                                                                                             | 93.8(3)  |
| O(11)-Ni(1)-N(3)                                                                                                                                                              | 89.4(2)   | N(6)-Cu(1)-O(1A)                                                                                                                                           | 92.2(1)  | O(11)-Zn(1)-N(1A)                                                                                                                                                             | 93.0(2)  |
| O(12)-Ni(1)-N(3)                                                                                                                                                              | 91.0(2)   | O(3A)-Cu(2)-N(1) <sup>#1</sup>                                                                                                                             | 90.0(2)  | O(14)-Zn(1)-N(1A)                                                                                                                                                             | 88.0(3)  |
| N(3)-Ni(1)-O(17)                                                                                                                                                              | 94.3(3)   | O(5A)-Cu(2)-N(1) <sup>#1</sup>                                                                                                                             | 88.1(2)  | N(4A) <sup>#1</sup> -Zn(1)-O(12)                                                                                                                                              | 85.6(3)  |
| O(15)-Ni(2)-N(1)                                                                                                                                                              | 92.3(2)   | O(3A)-Cu(2)-N(4)                                                                                                                                           | 89.8(2)  | N(6A)-Zn(2)-O(15)                                                                                                                                                             | 87.2(2)  |
| O(15) <sup>#1</sup> -Ni(2)-N(1)                                                                                                                                               | 87.8(2)   | O(5A)-Cu(2)-N(4)                                                                                                                                           | 90.5(2)  | N(6A)-Zn(2)-O(16)                                                                                                                                                             | 91.9(2)  |
| N(1)-Ni(2)-O(14)                                                                                                                                                              | 91.2(1)   | N(1) <sup>#1</sup> -Cu(2)-O(4A)                                                                                                                            | 95.2(2)  | N(6A)-Zn(2)-O(17)                                                                                                                                                             | 88.1(2)  |
| N(1)-Ni(2)-O(1B)                                                                                                                                                              | 88.8(1)   | N(4)-Cu(2)-O(4A)                                                                                                                                           | 93.1(2)  |                                                                                                                                                                               |          |
| <sup>#1</sup> <i>x</i> +1, - <i>y</i> +1, <i>z</i>                                                                                                                            |           | <sup>#1</sup> - <i>x</i> +1, - <i>y</i> +1, <i>z</i>                                                                                                       |          | <sup>#1</sup> - <i>x</i> +1, - <i>y</i> +1, <i>z</i>                                                                                                                          |          |
| [(Me <sub>2</sub> CO)(H <sub>2</sub> O)@Ni <sub>3</sub> ( <i>r,s</i> -L) <sub>2</sub> (H <sub>2</sub> O) <sub>11</sub> ](ClO <sub>4</sub> ) <sub>6</sub> ·7Me <sub>2</sub> CO |           | [(Me <sub>2</sub> CO)@Cu <sub>3</sub> ( <i>r,s</i> -L) <sub>2</sub> (H <sub>2</sub> O) <sub>9</sub> ](ClO <sub>4</sub> ) <sub>6</sub> ·7Me <sub>2</sub> CO |          | [(Me <sub>2</sub> CO)(H <sub>2</sub> O)@Zn <sub>3</sub> ( <i>r,s</i> -L) <sub>2</sub> (H <sub>2</sub> O) <sub>11</sub> ](ClO <sub>4</sub> ) <sub>6</sub> ·7Me <sub>2</sub> CO |          |
| Ni(1)-N(5) <sup>#1</sup>                                                                                                                                                      | 2.090(5)  | Cu(1)-N(4)                                                                                                                                                 | 1.986(6) | Zn(1)-N(43)                                                                                                                                                                   | 2.122(6) |
| Ni(1)-N(3)                                                                                                                                                                    | 2.094(5)  | Cu(2)-N(6) <sup>#1</sup>                                                                                                                                   | 1.982(6) | Zn(1)-N(64) <sup>#1</sup>                                                                                                                                                     | 2.104(7) |
| Ni(2)-N(1)                                                                                                                                                                    | 2.062(5)  | Cu(1)-O(4A)                                                                                                                                                | 2.001(4) | Zn(2)-N(22)                                                                                                                                                                   | 2.097(6) |
| Ni(1)-O(15)                                                                                                                                                                   | 2.037(5)  | Cu(1)-O(5A)                                                                                                                                                | 2.381(6) | Zn(1)-O(73)                                                                                                                                                                   | 2.09(1)  |
| Ni(1)-O(13)                                                                                                                                                                   | 2.057(4)  | Cu(2)-O(3A)                                                                                                                                                | 1.949(5) | Zn(1)-O(72)                                                                                                                                                                   | 2.10(1)  |
| Ni(1)-O(16)                                                                                                                                                                   | 2.058(5)  | Cu(2)-O(1A)                                                                                                                                                | 1.960(6) | Zn(1)-O(70)                                                                                                                                                                   | 2.16(1)  |
| Ni(2)-O(10)                                                                                                                                                                   | 2.065(5)  | Cu(2)-O(2A)                                                                                                                                                | 2.248(6) | Zn(2)-O(74)                                                                                                                                                                   | 2.11(1)  |
|                                                                                                                                                                               |           |                                                                                                                                                            |          | Zn(2)-O(2)                                                                                                                                                                    | 2.11(2)  |
| N(5) <sup>#1</sup> -Ni(1)-N(3)                                                                                                                                                | 176.5(2)  | N(4)-Cu(1)-N(4) <sup>#1</sup>                                                                                                                              | 174.9(3) | Zn(2)-O(3)                                                                                                                                                                    | 2.30(2)  |
| N(1)-Ni(2)-N(1) <sup>#1</sup>                                                                                                                                                 | 177.7(2)  | N(6) <sup>#1</sup> -Cu(2)-N(2)                                                                                                                             | 172.6(2) |                                                                                                                                                                               |          |
| O(15)-Ni(1)-N(5) <sup>#1</sup>                                                                                                                                                | 89.3(2)   | N(4)-Cu(1)-O(4A)                                                                                                                                           | 88.3(2)  | N(64) <sup>#1</sup> -Zn(1)-N(43)                                                                                                                                              | 175.1(4) |
| O(13)-Ni(1)-N(5) <sup>#1</sup>                                                                                                                                                | 91.45(17) | N(4) <sup>#1</sup> -Cu(1)-O(4A)                                                                                                                            | 91.6(2)  | N(22) <sup>#1</sup> -Zn(2)-N(22)                                                                                                                                              | 176.0(5) |
| O(16)-Ni(1)-N(5) <sup>#1</sup>                                                                                                                                                | 93.35(19) | N(4)-Cu(1)-O(5A)                                                                                                                                           | 92.5(2)  | O(73)-Zn(1)-N(43)                                                                                                                                                             | 87.8(4)  |
| O(15)-Ni(1)-N(3)                                                                                                                                                              | 87.91(19) | O(3A)-Cu(2)-N(6) <sup>#1</sup>                                                                                                                             | 90.6(2)  | O(71)-Zn(1)-N(43)                                                                                                                                                             | 91.3(4)  |
| O(13)-Ni(1)-N(3)                                                                                                                                                              | 91.11(18) | O(1A)-Cu(2)-N(6) <sup>#1</sup>                                                                                                                             | 87.9(2)  | O(72)-Zn(1)-N(43)                                                                                                                                                             | 87.9(4)  |
| O(16)-Ni(1)-N(3)                                                                                                                                                              | 88.85(18) | O(3A)-Cu(2)-N(2)                                                                                                                                           | 89.3(2)  | N(43)-Zn(1)-O(70)                                                                                                                                                             | 86.6(4)  |
| N(1)-Ni(2)-O(10)                                                                                                                                                              | 91.16(12) | O(1A)-Cu(2)-N(2)                                                                                                                                           | 90.8(2)  | N(22)-Zn(2)-O(74)                                                                                                                                                             | 87.7(4)  |
| O(11)-Ni(2)-O(1B)                                                                                                                                                             | 90.32(19) | N(6) <sup>#1</sup> -Cu(2)-O(2A)                                                                                                                            | 94.4(2)  | N(22)-Zn(2)-O(2)                                                                                                                                                              | 92.0(2)  |
| N(1)-Ni(2)-O(1B)                                                                                                                                                              | 88.84(12) | N(2)-Cu(2)-O(2A)                                                                                                                                           | 92.8(2)  | N(22)-Zn(2)-O(3)                                                                                                                                                              | 88.0(2)  |
| <sup>#1</sup> - <i>x</i> +1, - <i>y</i> +1, <i>z</i>                                                                                                                          |           | <sup>#1</sup> - <i>x</i> +1, - <i>y</i> +1, <i>z</i>                                                                                                       |          | <sup>#1</sup> - <i>x</i> +1, - <i>y</i> +1, <i>z</i>                                                                                                                          |          |

**Table S3** Solubility of the ligands and the complexes in some selected solvents

| Sample                          | L  | Ni <sub>3</sub> L <sub>2</sub> | Cu <sub>3</sub> L <sub>2</sub> | Zn <sub>3</sub> L <sub>2</sub> |
|---------------------------------|----|--------------------------------|--------------------------------|--------------------------------|
| H <sub>2</sub> O                | IS | SS                             | SS                             | SS                             |
| EtOH                            | IS | S                              | S                              | S                              |
| CH <sub>3</sub> CN              | S  | S                              | S                              | S                              |
| Me <sub>2</sub> CO              | S  | SS                             | SS                             | SS                             |
| CHCl <sub>3</sub>               | S  | IS                             | IS                             | IS                             |
| CH <sub>2</sub> Cl <sub>2</sub> | S  | IS                             | IS                             | IS                             |
| Me <sub>2</sub> SO              | S  | S                              | S                              | S                              |
| DMF                             | S  | S                              | S                              | S                              |

S = Soluble; SS = Sparingly soluble; IS = Insoluble

Ni<sub>3</sub>L<sub>2</sub> = [(Me<sub>2</sub>CO)(H<sub>2</sub>O)@Ni<sub>3</sub>(*s,r*- or *r,s*-L)<sub>2</sub>(H<sub>2</sub>O)<sub>11</sub>](ClO<sub>4</sub>)<sub>6</sub>·7Me<sub>2</sub>CO

Cu<sub>3</sub>L<sub>2</sub> = [(Me<sub>2</sub>CO)@Cu<sub>3</sub>(*s,r*- or *r,s*-L)<sub>2</sub>(H<sub>2</sub>O)<sub>9</sub>](ClO<sub>4</sub>)<sub>6</sub>·7Me<sub>2</sub>CO

Zn<sub>3</sub>L<sub>2</sub> = [(Me<sub>2</sub>CO)(H<sub>2</sub>O)@Zn<sub>3</sub>(*s,r*- or *r,s*-L)<sub>2</sub>(H<sub>2</sub>O)<sub>11</sub>](ClO<sub>4</sub>)<sub>6</sub>·7Me<sub>2</sub>CO

## Crystallographic data problems

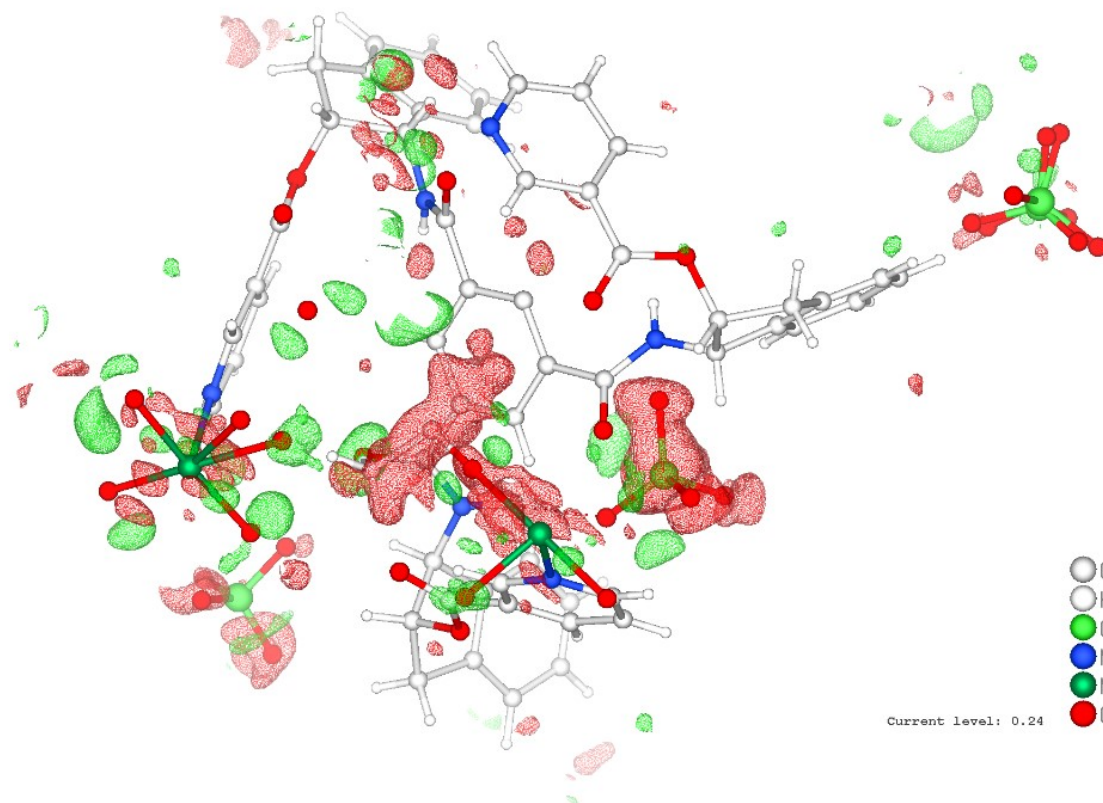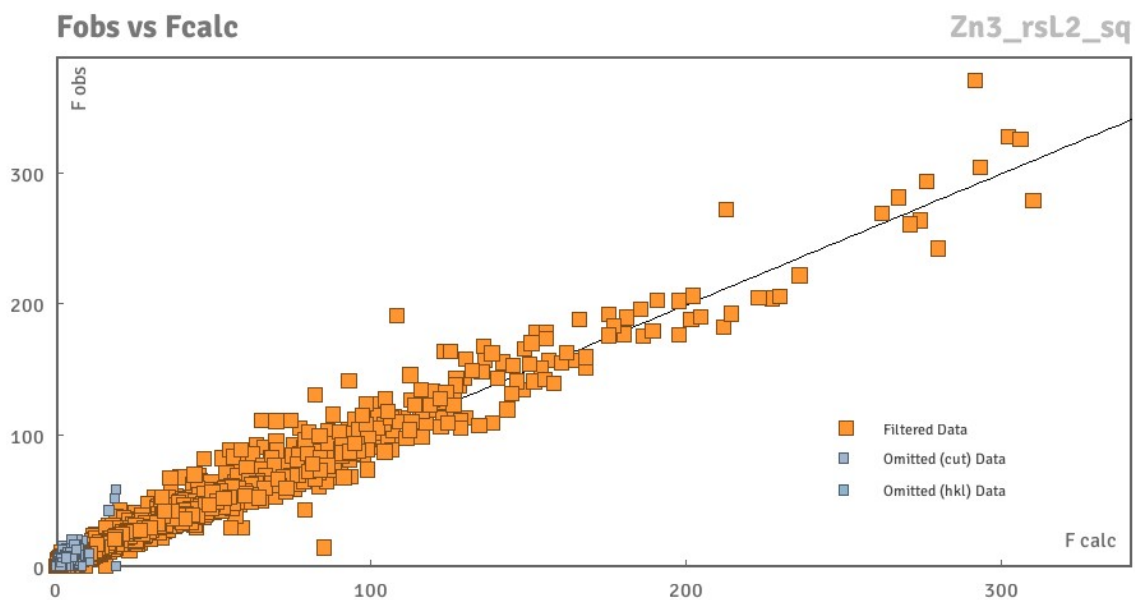

All crystals showed low crystallinity as well as sensitivity to the aerobic condition, and the synchrotron can measure data by one axis only. Insufficient data make several problems:

1. The perchlorate anions seems to over-assigned (top figure).

2. Fobs vs Fcalc plot of Zn3\_rsL2\_sq was not good (bottom figure).

So we confirmed the cage structures using different methods (NMR, IR, CD, and Mass). And the chiral butanol exchanged data is only used for interaction modeling for DFT calculation.

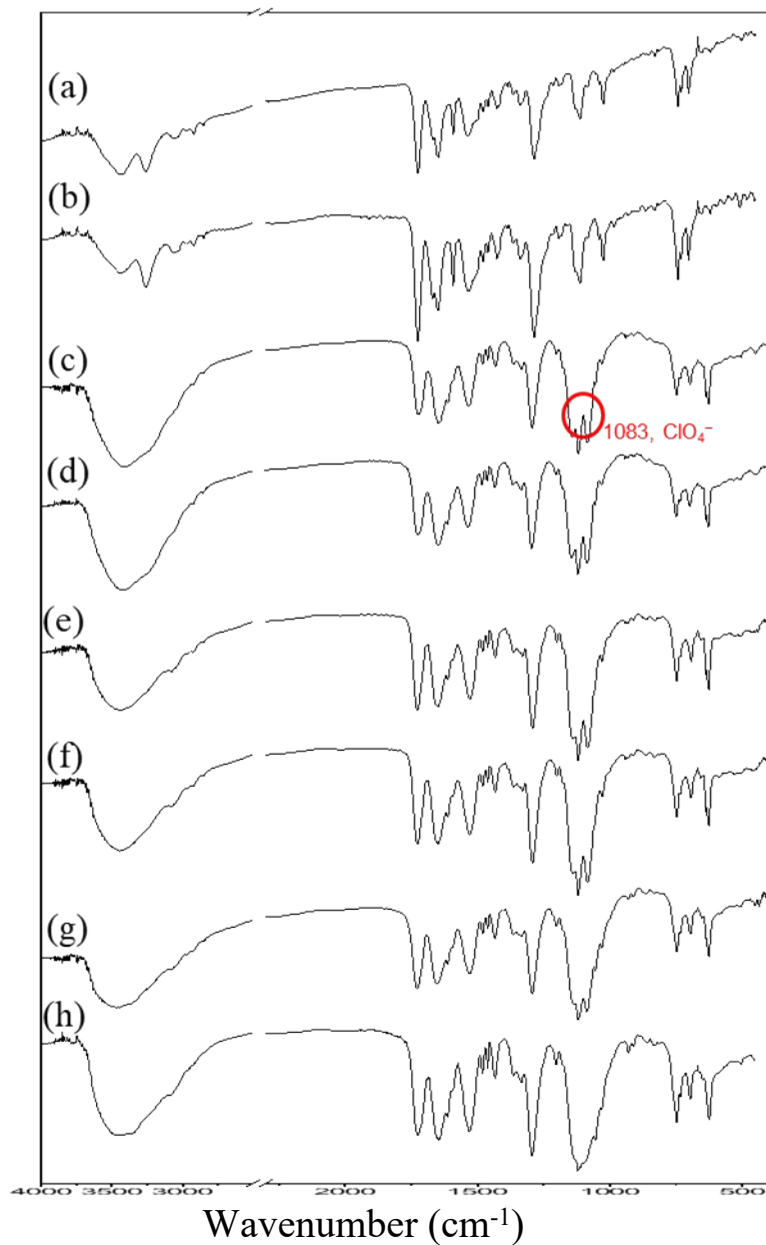

**Fig. S1** IR spectra of *s,r*-L (a), *r,s*-L (b), [(Me<sub>2</sub>CO)(H<sub>2</sub>O)@Ni<sub>3</sub>(*s,r*-L)<sub>2</sub>(H<sub>2</sub>O)<sub>11</sub>](ClO<sub>4</sub>)<sub>6</sub>·7Me<sub>2</sub>CO (c), [(Me<sub>2</sub>CO)(H<sub>2</sub>O)@Ni<sub>3</sub>(*r,s*-L)<sub>2</sub>(H<sub>2</sub>O)<sub>11</sub>](ClO<sub>4</sub>)<sub>6</sub>·7Me<sub>2</sub>CO (d), [(Me<sub>2</sub>CO)@Cu<sub>3</sub>(*s,r*-L)<sub>2</sub>(H<sub>2</sub>O)<sub>9</sub>](ClO<sub>4</sub>)<sub>6</sub>·7Me<sub>2</sub>CO (e), [(Me<sub>2</sub>CO)@Cu<sub>3</sub>(*r,s*-L)<sub>2</sub>(H<sub>2</sub>O)<sub>9</sub>](ClO<sub>4</sub>)<sub>6</sub>·7Me<sub>2</sub>CO (f), [(Me<sub>2</sub>CO)(H<sub>2</sub>O)@Zn<sub>3</sub>(*s,r*-L)<sub>2</sub>(H<sub>2</sub>O)<sub>11</sub>](ClO<sub>4</sub>)<sub>6</sub>·7Me<sub>2</sub>CO (g), and [(Me<sub>2</sub>CO)(H<sub>2</sub>O)@Zn<sub>3</sub>(*r,s*-L)<sub>2</sub>(H<sub>2</sub>O)<sub>11</sub>](ClO<sub>4</sub>)<sub>6</sub>·7Me<sub>2</sub>CO (h).



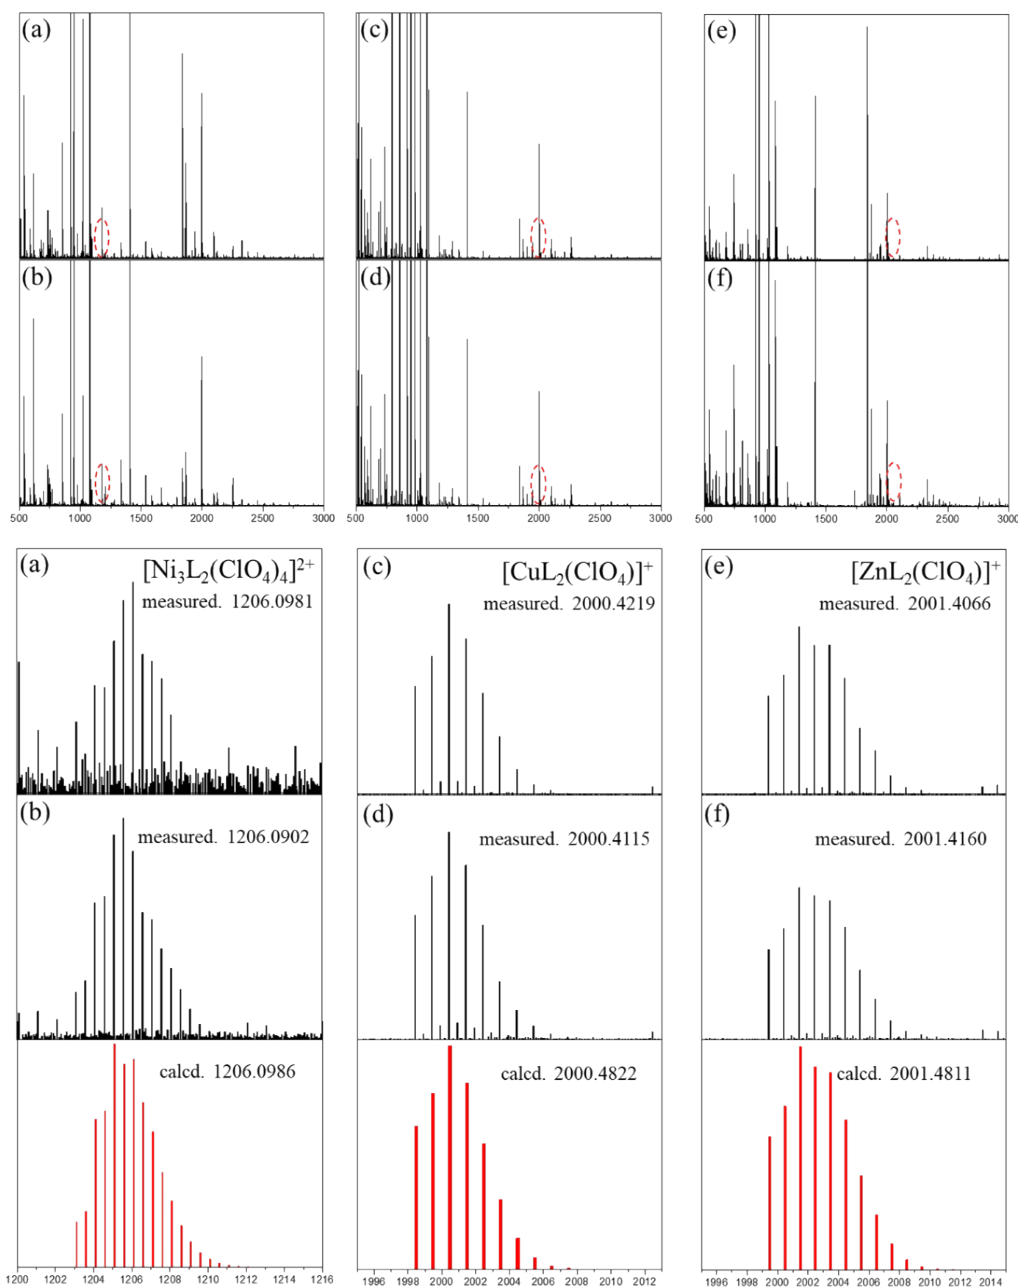

**Fig. S2** ESI-Mass data of  $[(\text{Me}_2\text{CO})(\text{H}_2\text{O})@\text{Ni}_3(s,r\text{-L})_2(\text{H}_2\text{O})_{11}](\text{ClO}_4)_6 \cdot 7\text{Me}_2\text{CO}$  (a),  $[(\text{Me}_2\text{CO})(\text{H}_2\text{O})@\text{Ni}_3(r,s\text{-L})_2(\text{H}_2\text{O})_{11}](\text{ClO}_4)_6 \cdot 7\text{Me}_2\text{CO}$  (b),  $[(\text{Me}_2\text{CO})@\text{Cu}_3(s,r\text{-L})_2(\text{H}_2\text{O})_9](\text{ClO}_4)_6 \cdot 7\text{Me}_2\text{CO}$  (c),  $[(\text{Me}_2\text{CO})@\text{Cu}_3(r,s\text{-L})_2(\text{H}_2\text{O})_9](\text{ClO}_4)_6 \cdot 7\text{Me}_2\text{CO}$  (d),  $[(\text{Me}_2\text{CO})(\text{H}_2\text{O})@\text{Zn}_3(s,r\text{-L})_2(\text{H}_2\text{O})_{11}](\text{ClO}_4)_6 \cdot 7\text{Me}_2\text{CO}$  (e), and  $[(\text{Me}_2\text{CO})(\text{H}_2\text{O})@\text{Zn}_3(r,s\text{-L})_2(\text{H}_2\text{O})_{11}](\text{ClO}_4)_6 \cdot 7\text{Me}_2\text{CO}$  (f).

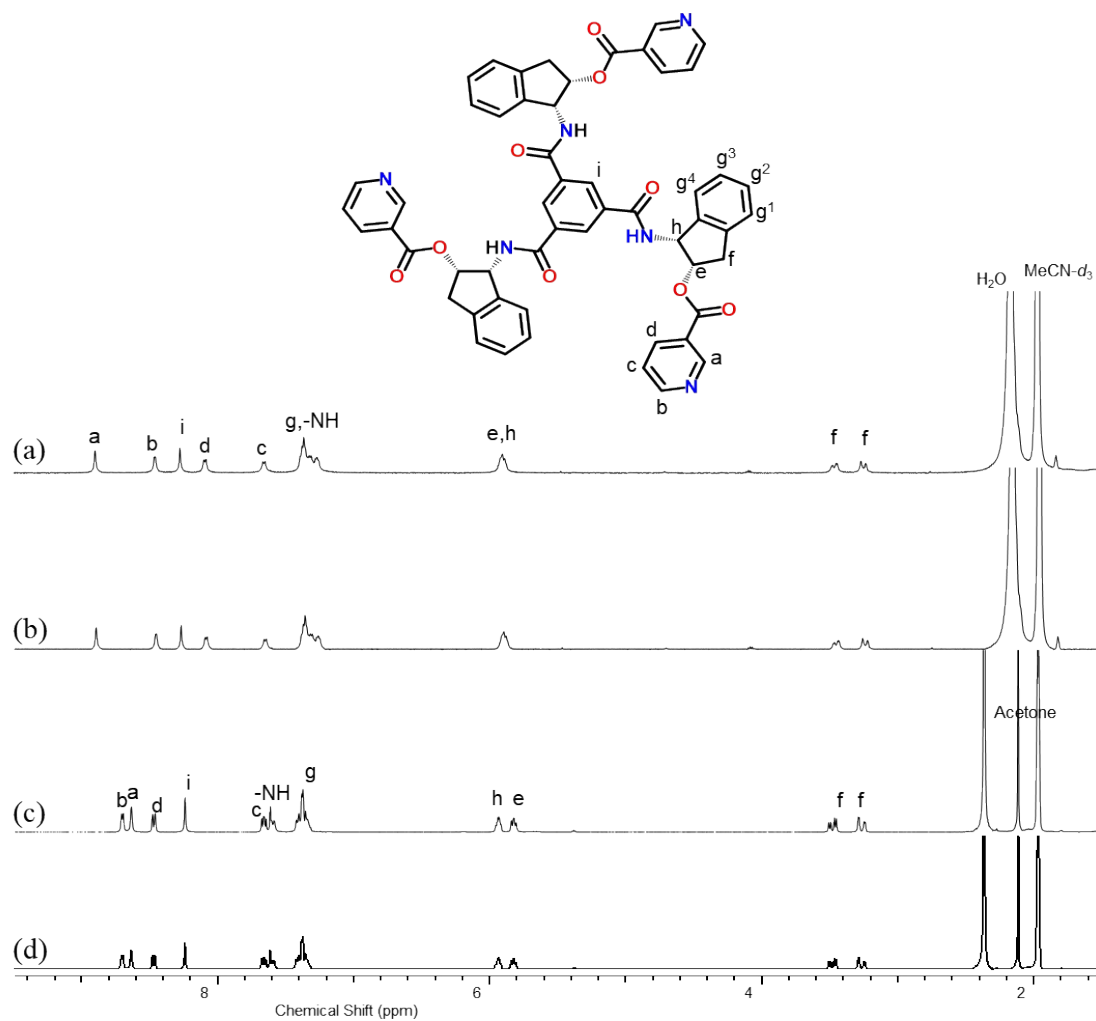

**Fig. S3**  $^1\text{H}$  NMR spectra of *s,r*-L (a), *r,s*-L (b),  $[(\text{Me}_2\text{CO})(\text{H}_2\text{O})@\text{Zn}_3(\textit{s,r}\text{-L})_2(\text{H}_2\text{O})_{11}](\text{ClO}_4)_6 \cdot 7\text{Me}_2\text{CO}$  (c), and  $[(\text{Me}_2\text{CO})(\text{H}_2\text{O})@\text{Zn}_3(\textit{r,s}\text{-L})_2(\text{H}_2\text{O})_{11}](\text{ClO}_4)_6 \cdot 7\text{Me}_2\text{CO}$  (d) in MeCN-*d*<sub>3</sub>.

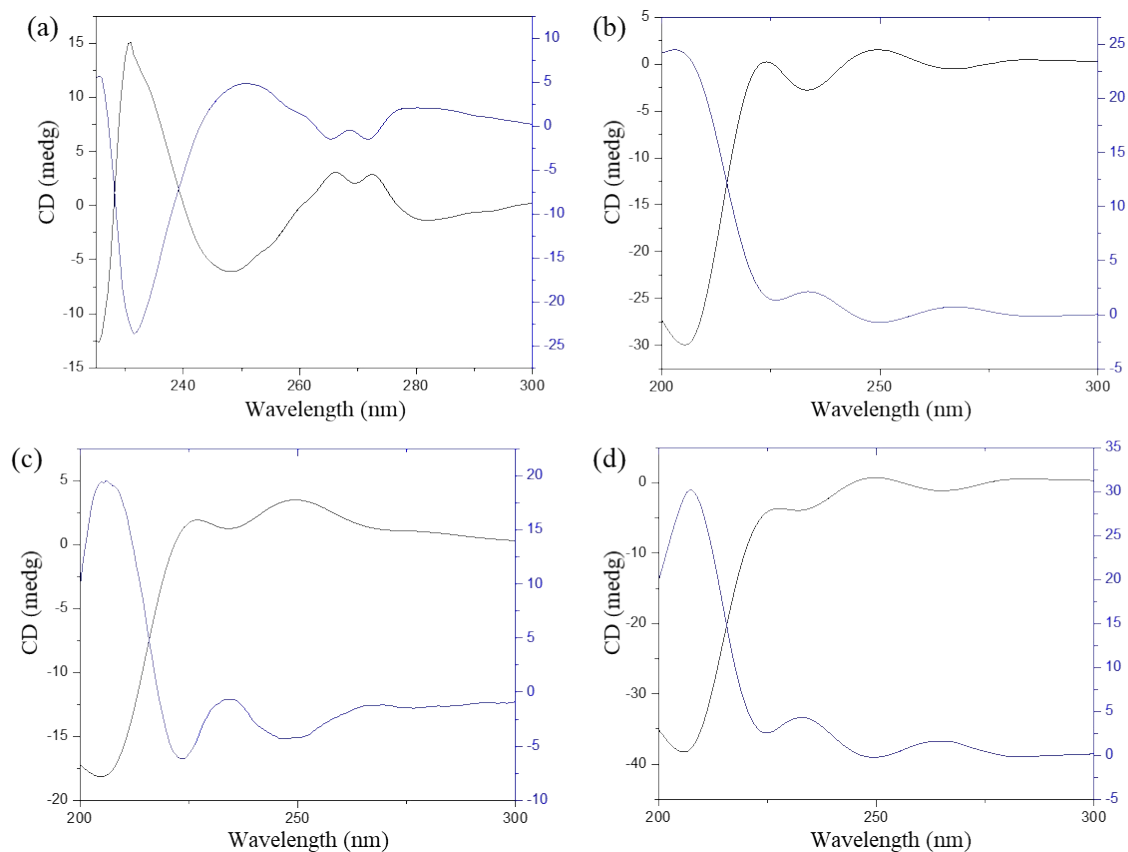

**Fig. S4** CD spectra for *s,r*-L (black line) and *r,s*-L (blue line) (a),  $[(\text{Me}_2\text{CO})(\text{H}_2\text{O})@\text{Ni}_3(\text{s},\text{r}\text{-L})_2(\text{H}_2\text{O})_{11}](\text{ClO}_4)_6 \cdot 7\text{Me}_2\text{CO}$  (black line),  $[(\text{Me}_2\text{CO})(\text{H}_2\text{O})@\text{Ni}_3(\text{r},\text{s}\text{-L})_2(\text{H}_2\text{O})_{11}](\text{ClO}_4)_6 \cdot 7\text{Me}_2\text{CO}$  (blue line) (b),  $[(\text{Me}_2\text{CO})@\text{Cu}_3(\text{s},\text{r}\text{-L})_2(\text{H}_2\text{O})_9](\text{ClO}_4)_6 \cdot 7\text{Me}_2\text{CO}$  (black line),  $[(\text{Me}_2\text{CO})@\text{Cu}_3(\text{r},\text{s}\text{-L})_2(\text{H}_2\text{O})_9](\text{ClO}_4)_6 \cdot 7\text{Me}_2\text{CO}$  (blue line) (c),  $[(\text{Me}_2\text{CO})(\text{H}_2\text{O})@\text{Zn}_3(\text{s},\text{r}\text{-L})_2(\text{H}_2\text{O})_{11}](\text{ClO}_4)_6 \cdot 7\text{Me}_2\text{CO}$  (black line), and  $[(\text{Me}_2\text{CO})(\text{H}_2\text{O})@\text{Zn}_3(\text{r},\text{s}\text{-L})_2(\text{H}_2\text{O})_{11}](\text{ClO}_4)_6 \cdot 7\text{Me}_2\text{CO}$  (blue line) (d).

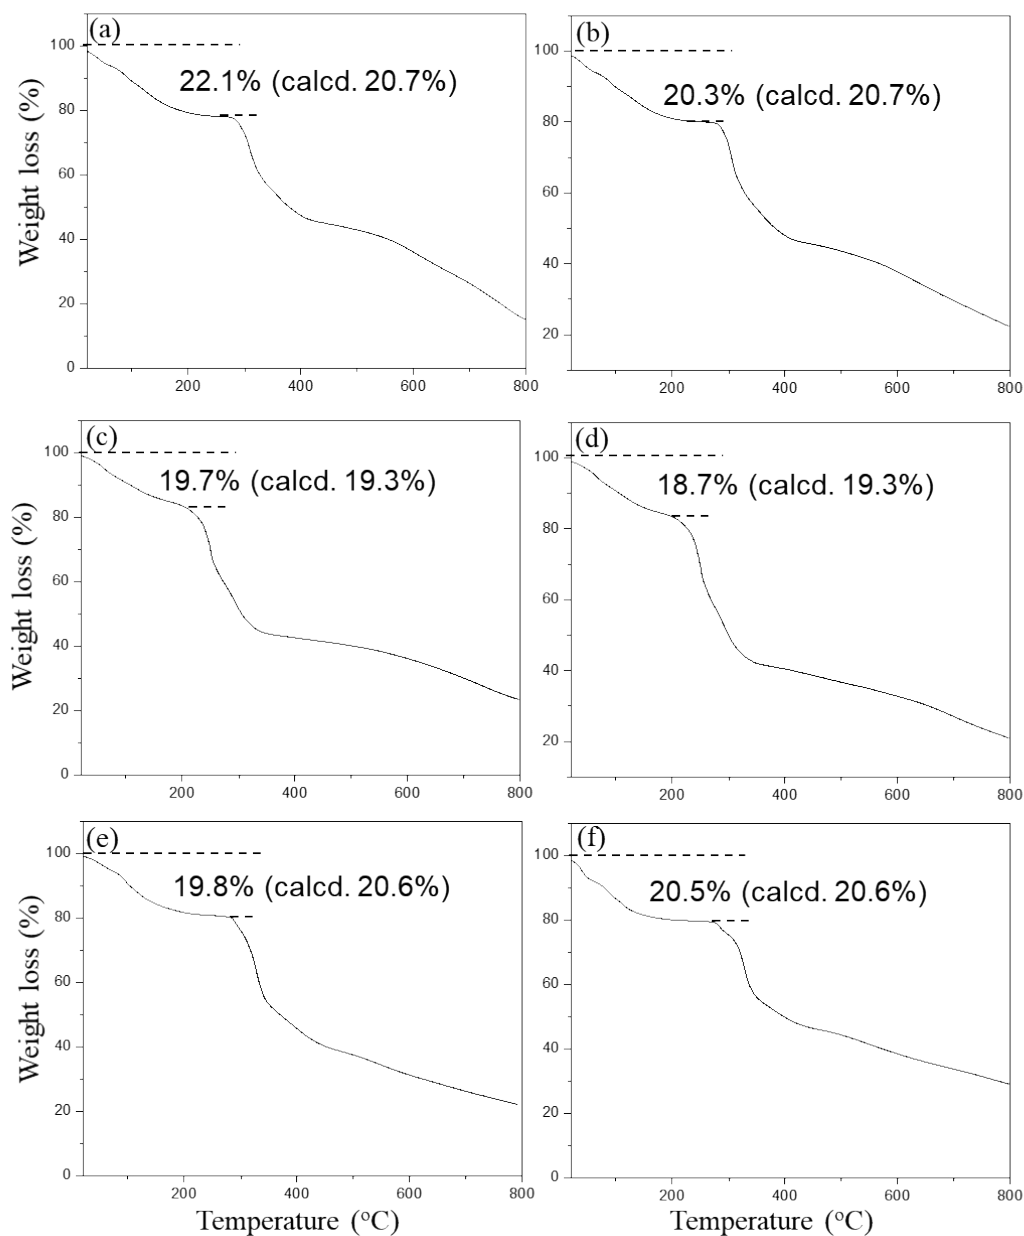

**Fig. S5** TG curves for  $[(\text{Me}_2\text{CO})(\text{H}_2\text{O})@\text{Ni}_3(s,r\text{-}L)_2(\text{H}_2\text{O})_{11}](\text{ClO}_4)_6 \cdot 7\text{Me}_2\text{CO}$  (a),  $[(\text{Me}_2\text{CO})(\text{H}_2\text{O})@\text{Ni}_3(r,s\text{-}L)_2(\text{H}_2\text{O})_{11}](\text{ClO}_4)_6 \cdot 7\text{Me}_2\text{CO}$  (b),  $[(\text{Me}_2\text{CO})@\text{Cu}_3(s,r\text{-}L)_2(\text{H}_2\text{O})_9](\text{ClO}_4)_6 \cdot 7\text{Me}_2\text{CO}$  (c),  $[(\text{Me}_2\text{CO})@\text{Cu}_3(r,s\text{-}L)_2(\text{H}_2\text{O})_9](\text{ClO}_4)_6 \cdot 7\text{Me}_2\text{CO}$  (d),  $[(\text{Me}_2\text{CO})(\text{H}_2\text{O})@\text{Zn}_3(s,r\text{-}L)_2(\text{H}_2\text{O})_{11}](\text{ClO}_4)_6 \cdot 7\text{Me}_2\text{CO}$  (e), and  $[(\text{Me}_2\text{CO})(\text{H}_2\text{O})@\text{Zn}_3(r,s\text{-}L)_2(\text{H}_2\text{O})_{11}](\text{ClO}_4)_6 \cdot 7\text{Me}_2\text{CO}$  (f).

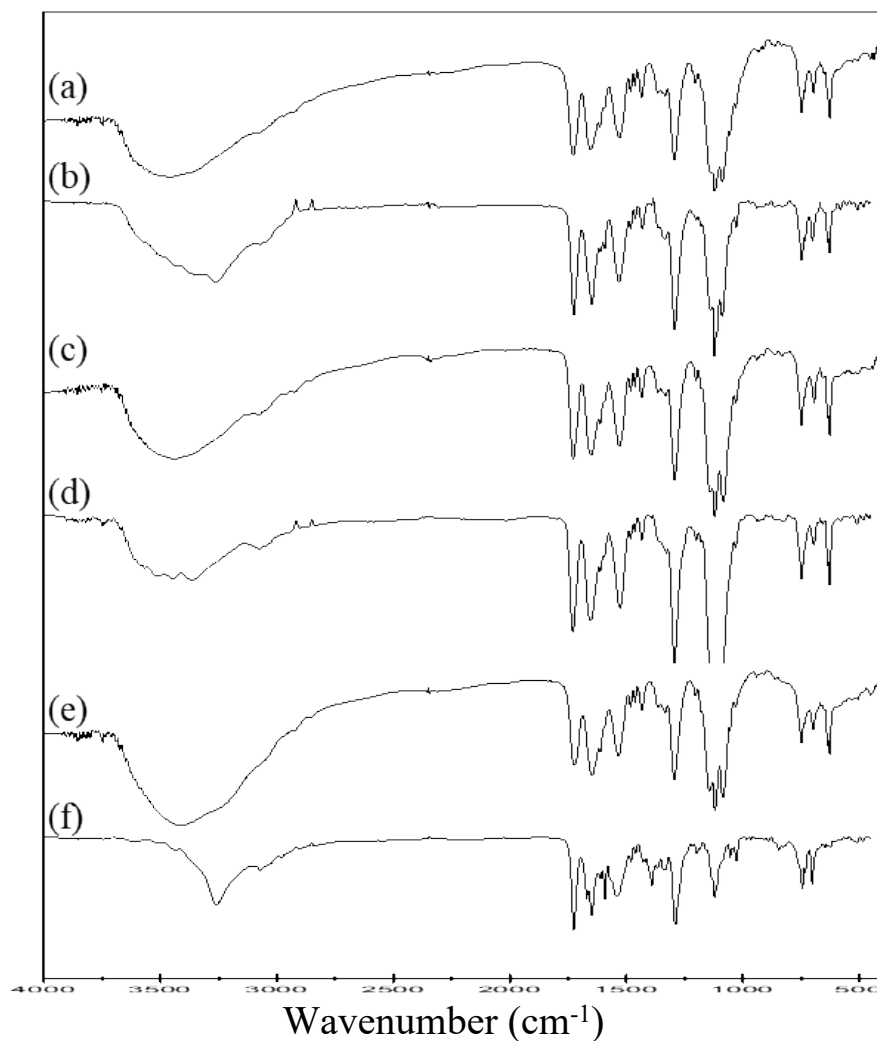

**Fig. S6** IR spectra of  $[(\text{Me}_2\text{CO})(\text{H}_2\text{O})@\text{Ni}_3(s,r\text{-L})_2(\text{H}_2\text{O})_{11}](\text{ClO}_4)_6 \cdot 7\text{Me}_2\text{CO}$  (a),  $[(\text{Me}_2\text{CO})@\text{Cu}_3(s,r\text{-L})_2(\text{H}_2\text{O})_9](\text{ClO}_4)_6 \cdot 7\text{Me}_2\text{CO}$  (c), and  $[(\text{Me}_2\text{CO})(\text{H}_2\text{O})@\text{Zn}_3(s,r\text{-L})_2(\text{H}_2\text{O})_{11}](\text{ClO}_4)_6 \cdot 7\text{Me}_2\text{CO}$  (e). IR spectra of dispersed in EtOH by sonication for 4 h and drop-casted  $[(\text{Me}_2\text{CO})(\text{H}_2\text{O})@\text{Ni}_3(s,r\text{-L})_2(\text{H}_2\text{O})_{11}](\text{ClO}_4)_6 \cdot 7\text{Me}_2\text{CO}$  (b),  $[(\text{Me}_2\text{CO})@\text{Cu}_3(s,r\text{-L})_2(\text{H}_2\text{O})_9](\text{ClO}_4)_6 \cdot 7\text{Me}_2\text{CO}$  (d), and  $[(\text{Me}_2\text{CO})(\text{H}_2\text{O})@\text{Zn}_3(s,r\text{-L})_2(\text{H}_2\text{O})_{11}](\text{ClO}_4)_6 \cdot 7\text{Me}_2\text{CO}$  (f).

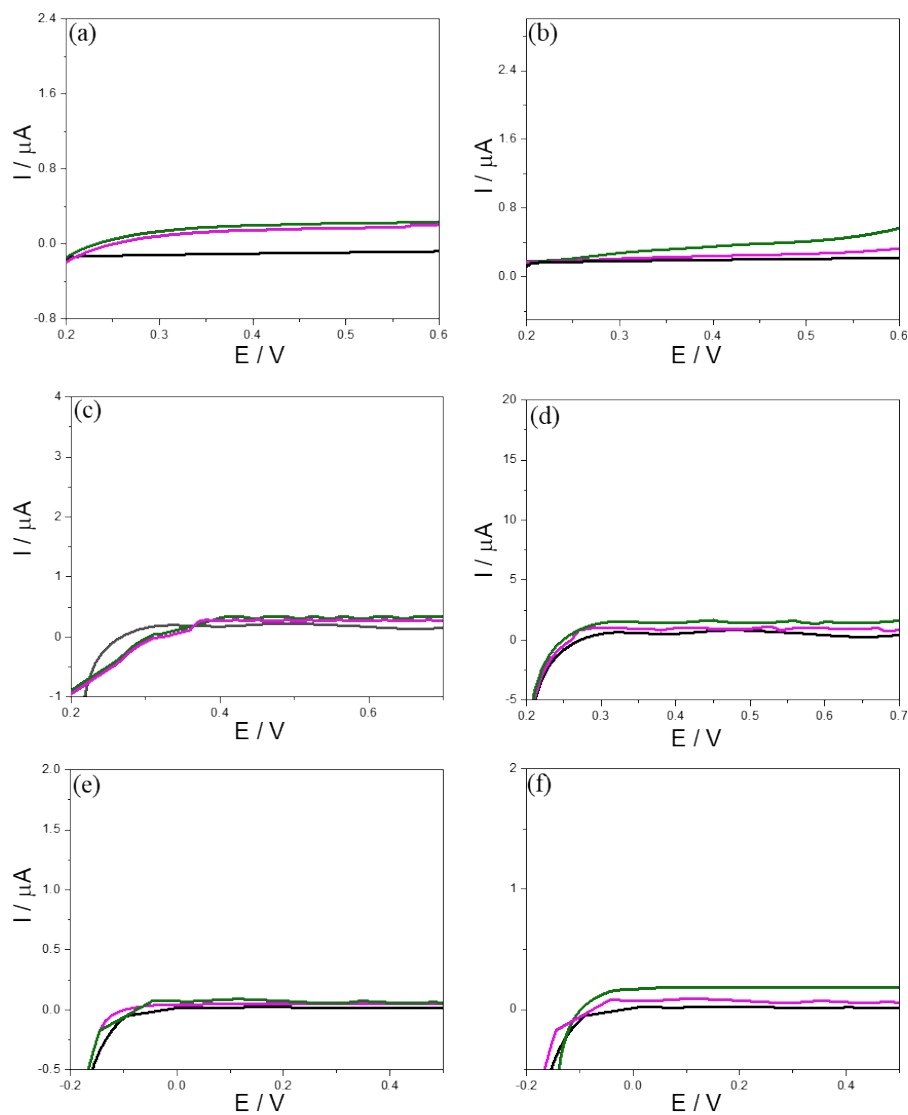

**Fig. S7** Linear sweep voltammetry (LSV) signals of only chiral cages (black line)  $[(\text{Me}_2\text{CO})(\text{H}_2\text{O})@\text{Ni}_3(s,r\text{-}L)_2(\text{H}_2\text{O})_{11}](\text{ClO}_4)_6 \cdot 7\text{Me}_2\text{CO}$  (a),  $[(\text{Me}_2\text{CO})(\text{H}_2\text{O})@\text{Ni}_3(r,s\text{-}L)_2(\text{H}_2\text{O})_{11}](\text{ClO}_4)_6 \cdot 7\text{Me}_2\text{CO}$  (b),  $[(\text{Me}_2\text{CO})@\text{Cu}_3(s,r\text{-}L)_2(\text{H}_2\text{O})_9](\text{ClO}_4)_6 \cdot 7\text{Me}_2\text{CO}$  (c),  $[(\text{Me}_2\text{CO})@\text{Cu}_3(r,s\text{-}L)_2(\text{H}_2\text{O})_9](\text{ClO}_4)_6 \cdot 7\text{Me}_2\text{CO}$  (d),  $[(\text{Me}_2\text{CO})(\text{H}_2\text{O})@\text{Zn}_3(s,r\text{-}L)_2(\text{H}_2\text{O})_{11}](\text{ClO}_4)_6 \cdot 7\text{Me}_2\text{CO}$  (e), and  $[(\text{Me}_2\text{CO})(\text{H}_2\text{O})@\text{Zn}_3(r,s\text{-}L)_2(\text{H}_2\text{O})_{11}](\text{ClO}_4)_6 \cdot 7\text{Me}_2\text{CO}$  (f). Pink line indicates only (*S*)-2-BuOH signal, and green line indicates only (*R*)-2-BuOH signal.

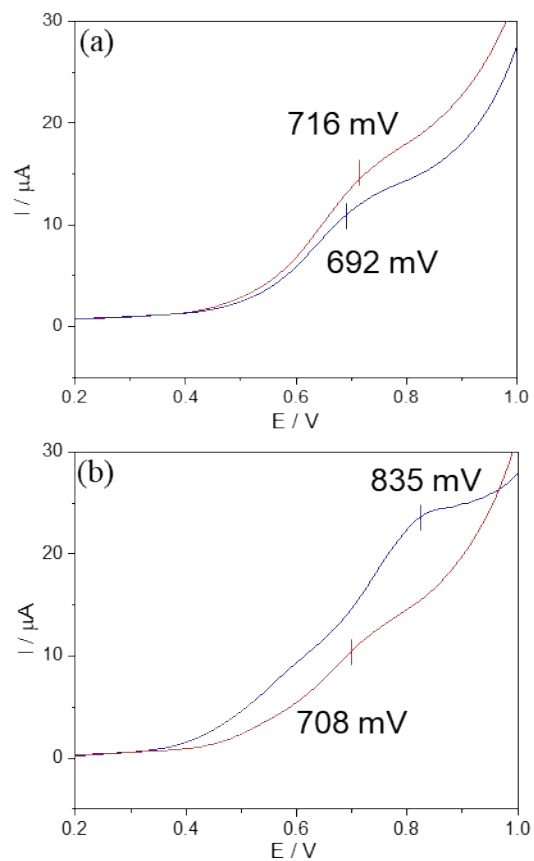

**Fig. S8** Linear sweep voltammetry (LSV) signals of  $[(\text{Me}_2\text{CO})(\text{H}_2\text{O})@\text{Zn}_3(s,r\text{-L})_2(\text{H}_2\text{O})_{11}](\text{ClO}_4)_6 \cdot 7\text{Me}_2\text{CO}$  (a), and  $[(\text{Me}_2\text{CO})(\text{H}_2\text{O})@\text{Zn}_3(r,s\text{-L})_2(\text{H}_2\text{O})_{11}](\text{ClO}_4)_6 \cdot 7\text{Me}_2\text{CO}$  (b) in presence of 1.0 mM (*S*)-2-BuOH (blue line) and (*R*)-2-BuOH (red line).
